# Supplementary material for: Cross-Cultural Ethnobotanical Assembly as a New Tool for Understanding Medicinal and Culinary Values–The Genus Lycium as A Case Study
Source: Front Pharmacol. 2021 Jul 16;12:708518. doi: 10.3389/fphar.2021.708518 (PMC8322658; doi:10.3389/fphar.2021.708518)
Supplement: Supplementary file 1 [file Table1.XLSX]

## Sheet: comparison_list
(TPL, 2013)-94	(WFO, 2021)-91	CATALOGUE OF LIFE (2020-12-1)-101	( POWO, 2021)-105	Regional floras	treatment	revised list	native to	Region	Reference 1	reference 2	reference 3	SPECIMEN 1	SPECIMEN 2	SPECIMEN-SUGGEST
Lycium acutifolium E. Mey. ex Dunal	Lycium acutifolium E. Mey. ex Dunal	synonym of Lycium elliotii Dammer(1912)	Lycium acutifolium E. Mey. ex Dunal	African Plant Database(AFPD);Plants of southern Africa: an annotated checklist(PSAF)	Accept(law of priority)	Lycium acutifolium E. Mey. ex Dunal	AF-S-South Africa, Madagascar	AF-S	Zwei Pflanzengeogr. Docum. (Drège) (1842)	Prodr. (DC.) 13(1): 518 (1852)	Bot. Jahrb. Syst. 48: 229-230 (1913)	Lycium_acutifolium_MBG_MO-2490417
Lycium afrum L.	Lycium afrum L.	Lycium afrum L.	Lycium afrum L.			Lycium afrum L.	AF-S-South Africa	AF-S
not include	not include	Lycium amarum Lu Q. Huang	Lycium amarum Lu Q. Huang		Accept(new species)	Lycium amarum Lu Q.Huang	Tibet	ASIA-E	Xie, D.-M., Zhang, X.-B., Qian, D., Zha, X., Huang, L.-Q., 2016. Lycium amarumsp. nov. (Solanaceae) from Xizang, supported from morphological characters and phylogenetic analysis. Nordic Journal of Botany 34(5), 538-544.
Lycium ameghinoi Speg.	Lycium ameghinoi Speg.	Lycium ameghinoi Speg.	Lycium ameghinoi Speg.			Lycium ameghinoi Speg.	SAM-Argentina	SAM
Lycium americanum Jacq.	Lycium americanum Jacq.	Lycium americanum Jacq.	Lycium americanum Jacq.			Lycium americanum Jacq.	SAM-Venezuela, Argentina	SAM
unresolved	Lycium amoenum Dammer	Lycium amoenum Dammer	Lycium amoenum Dammer	The Euro+Med PlantBase(EUMP)		Lycium amoenum Dammer	AF-S-South Africa	AF-S
unresolved	synonym	Lycium anatolicum A. Baytop & R. R. Mill	Lycium anatolicum A. Baytop & R. R. Mill	EUMP		Lycium anatolicum A.Baytop & R.R.Mill	Turkey	Medit
Lycium andersonii A. Gray	Lycium andersonii A. Gray	Lycium andersonii A. Gray	Lycium andersonii A. Gray			Lycium andersonii A.Gray	NAM-Mexico	NAM
Lycium andersonii var. deserticola (C.L. Hitchc.) Jeps.					Remove(variety)	xx
synonym of Lycium cinereum	Lycium arenicola Miers	Lycium arenicola Miers	Lycium arenicola Miers	incorrect citation	Remove(later than arenicolum)	xx	AF-South Africa	AF-S	WFO, COL, POWO-Miss-citation of first publish; the referred name should be the next.	Young branches pendulous; leaves, stems and calyces more or less glabrous; flowers unisexual; ripe berries red to black. Leaves clustered on branchlets, 6-15 per cluster, herbaceous, subsessile; blade linear, narrowly ovate or obovate, 14-25 x 1-3 mm, bright green, rarely dull green, glabrous.
Lycium arenicolum Miers	not include	not include	not include	TPL, APD	Accept(law of priority)	Lycium arenicolum Miers	AF-South Africa	AF-S	Ann. Mag. Nat. Hist. 1854, 14(79): 14-15.	This plant has greatly the habit and appearance of L. tenue, and is remarkable for the cupular nodes that project from the axils, and that are decurrent on each side with the angles of the stem: five to ten leaves grow out of each node, and are 5 to 7 lines long, 1/2 line broad: the peduncle is barely longer than half a line, the calyx 1 line, the teeth of the corolla 3/2 lines, the segments of t…		AMNH1854- LIKE L. tenue
unresolved	synonym	Lycium armatum Griff.	Lycium armatum Griff.	No description	Remove(illegitimate)	xx	Bhutan	ASIA-E	Notulae ad plantas asiaticas, 1854, 4: 95. no description			worldplants: provisionally accepted name
unresolved	Lycium arochae "F.Chiang, T.Wendt & E.J.Lott"	Lycium arochae F. Chiang, T. Wendt & E. J. Lott	Lycium arochae F.Chiang, T.Wendt & E.J.Lott			Lycium arochae F. Chiang, T. Wendt & E.J. Lott	NAM-Mexico	NAM
unresolved	Lycium athium Bernardello	Lycium athium Bernardello	Lycium athium Bernardello			Lycium athium Bernardello	SAM-Argentina	SAM
unresolved	Lycium australe F.Muell.	Lycium australe F. Muell.	Lycium australe F.Muell.			Lycium australe F.Muell.	Ausralia	AUS
Lycium barbarum L.	Lycium barbarum L.	Lycium barbarum L.	Lycium barbarum L.			Lycium barbarum L.	China	ASIA-E
unresolved	synonym	synonym of Lycium berlandieri	Lycium barbinodum Miers		Remove(synonym)	xx	NAM-Mexico	NAM	Ann. Mag. Nat. Hist. ser. 2, 14(80): 138 (1854).		Prodr. (DC.) 13(1): 520 (1852)	Lycium_barbinodum-GH-00077167	Lycium_berlandieri-GH00077169	synonym
Lycium berberioides Correll	synonym	synonym of Lycium puberulum var. berberidoides		Flora of North America(FONAM), Integrated Taxonomic Information System(ITIS)	Remove(synonym)	XX	NAM-Texas, US	NAM	Wrightia 3(7): 138–139. 1965.			Lycium_berberioides-GH-00077137	Lycium_puberulum-A-00077153	Lycium_puberulum-GH-00939558
Lycium berlandieri Dunal	Lycium berlandieri Dunal	Lycium berlandieri Dunal	Lycium berlandieri Dunal			Lycium berlandieri Dunal	NAM-Mexico, US	NAM
Lycium berlandieri var. parviflorum (A. Gray) A. Terracc.					Remove(variety)	xx
not include	Lycium boerhaviifolium L.f.	Lycium boerhaviifolium L. fil.	Lycium boerhaviifolium L.f.			Lycium boerhaviifolium L.f.	SAM-S	SAM				Lycium boerhaviifolium-LINN 259.12
Lycium bosciifolium Schinz	Lycium bosciifolium Schinz	Lycium bosciifolium Schinz	Lycium bosciifolium Schinz (1782)			Lycium bosciifolium Schinz	AF-S	AF-S
Lycium brevipes Benth.	Lycium brevipes Benth.	Lycium brevipes Benth.	Lycium brevipes Benth.			Lycium brevipes Benth.	NAM-Mexico, US	NAM
unresolved	Lycium bridgesii "(Miers) R.A.Levin, Jill S.Mill. & Bernardello"	Lycium bridgesii (Miers) R. A. Levin, Jill S. Mill. & Bernardello	Lycium bridgesii (Miers) R.A.Levin, Jill S.Mill. & G.Bernardello			Lycium bridgesii (Miers) R.A.Levin, Jill S.Mill. & G.Bernardello	SAM-Chile	SAM
Lycium californicum A. Gray	not include	not include	not include		Remove(author incorrect)	XX			IPNI
not include	Lycium californicum Nutt. ex A.Gray	Lycium californicum Nutt. ex A. Gray	Lycium californicum Nutt. ex A. Gray			Lycium californicum Nutt. ex A.Gray	NAM-Mexico, US	NAM	IPNI
Lycium carinatum S. Watson	synonym of Lycium californicum subsp. Carinatum	synonym of Lycium californicum subsp. Carinatum	synonym of Lycium californicum subsp. carinatum (S.Watson) Felger		Remove(variety)	XX	NAM					Lycium californicum var. carinatum-GH-00077170
Lycium carolinianum Walter	Lycium carolinianum Walter	Lycium carolinianum Walter	Lycium carolinianum Walter			Lycium carolinianum Walter	NAM-Mexico, US, Cuba	NAM
Lycium carolinianum var. quadrifidum (Moc. & Sessé ex Dunal) C.L. Hitchc.					Remove(variety)	xx
Lycium cestroides Schltdl.	Lycium cestroides Schltdl.	Lycium cestroides Schltdl.	Lycium cestroides Schltdl.			Lycium cestroides Schltdl.	SAM-Bolivia to Uruguay	SAM
Lycium chanar Phil.	Lycium chanar Phil.	Lycium chanar Phil.	Lycium chanar Phil.			Lycium chanar Phil.	SAM-Bolivia to NW. Argentina	SAM
Lycium chilense Bertero	Lycium chilense Bertero	Lycium chilense Bertero	Lycium chilense Bertero			Lycium chilense Bertero	SAM	SAM
Lycium chinense Mill.	Lycium chinense Mill.	Lycium chinense Mill.	Lycium chinense Mill.			Lycium chinense Mill.	China to Temp. E. Asia	ASIA-E
Lycium chinense var. potaninii (Pojark.) A.M.Lu					Remove(variety)	xx
Lycium ciliatum Schltdl.	Lycium ciliatum Schltdl.	Lycium ciliatum Schltdl.	Lycium ciliatum Schltdl.			Lycium ciliatum Schltdl.	SAM-Bolivia to N. Argentina	SAM
Lycium cinereum Thunb.	Lycium cinereum Thunb.	Lycium cinereum Thunb.	Lycium cinereum Thunb.			Lycium cinereum Thunb.	AF-S	AF-S				Lycium cinereum_G00015063.jpg
unresolved	synonym	Lycium cochinchinense Lour.	synonym of Lycium barbarum L.	Flora of China(FOC)->excluded	Remove(synonym)	XX	Vietnam	ASIA-E	Loureiro, J.d., 1790. Lycium cochinchinense Lour. Typis, et expensis academicis, Ulyssipone. 133-134			no speciemen
heterotypic synonym of Lycium elongatum Miers	heterotypic synonym of Lycium elongatum Miers(1854)	heterotypic synonym of Lycium elongatum Miers	Lycium confertum Miers	Flora of Agentina	Remove(synonym-later than elongatum)	XX	SAM-NW. Argentina			It varies in having the leaves more or less crowded, more or less attenuated ; they are from 3 to 6 lines long, 1/4 line broad ; the peduncle is 3/2 or 2 lines long ; the calycine tube is cylindrical, f line long, with narrow, linear, acute segments 5/4 line long : the tube of the corolla is 4 or 5 lines long, the segments of its border are 3/4 line long, the larger stamens are 2 lines in length …		BM000992173	BM000992175	two species
Lycium cooperi A. Gray	Lycium cooperi A.Gray	Lycium cooperi A. Gray	Lycium cooperi A.Gray			Lycium cooperi A.Gray	NAM-Mexico, US	NAM
Lycium cuneatum Dammer	Lycium cuneatum Dammer	Lycium cuneatum Dammer	Lycium cuneatum Dammer			Lycium cuneatum Dammer	SAM-Bolivia to N. Argentina	SAM
Lycium cyathiformum C.L. Hitchc.	Lycium cyathiforme C.L.Hitchc.	Lycium cyathiforme C. L. Hitchc.	Lycium cyathiformum C.L.Hitchc.			Lycium cyathiformum C.L.Hitchc.	SAM-E. Bolivia to Argentina	SAM
Lycium cylindricum Kuang & A. M. Lu	Lycium cylindricum K.Z.Kuang & A.M.Lu	Lycium cylindricum Kuang & A. M. Lu	Lycium cylindricum Kuang & A.M.Lu			Lycium cylindricum Kuang & A.M.Lu	China-NW	ASIA-E
Lycium dasystemum Pojark.	Lycium dasystemum Pojark.	Lycium dasystemum Pojark.	Lycium dasystemum Pojark.			Lycium dasystemum Pojark.	China-N	ASIA-E
Lycium decumbens Welw. ex Hiern	Lycium decumbens Welw. ex Hiern	Lycium decumbens Welw. ex Hiern	Lycium decumbens Welw. ex Hiern			Lycium decumbens Welw. ex Hiern	AF-S-Angola to Namibia	AF-S
Lycium densifolium Wiggins	Lycium densifolium Wiggins	Lycium densifolium Wiggins	Lycium densifolium Wiggins			Lycium densifolium Wiggins	NAM-Mexico	NAM
Lycium depressum Stocks	Lycium depressum Stocks	Lycium depressum Stocks	Lycium depressum Stocks			Lycium depressum Stocks	E. Medit. to Central Asia and Pakistan	ASIA-MW
Lycium deserti Phil.	Lycium deserti Phil.	Lycium deserti Phil.	Lycium deserti Phil.			Lycium deserti Phil.	SAM-N. Chile	SAM
Lycium dispermum Wiggins	heterotypic synonym	not include	not include		Remove(synonym)	XX						Lycium_dispermum_NMNH_00027253	Lycium_macrodon_NYBG_00138740	Synonym
Lycium distichum Meyen	Lycium distichum Meyen	Lycium distichum Meyen	Lycium distichum Meyen		Accept(law of priority)	Lycium distichum Meyen	SAM-Peru to Chile	SAM
Lycium divaricatum Rusby (1912)	heterotypic synonym of Lycium distichum Meyen		heterotypic synonym of Lycium distichum Meyen (1834)		Remove(synonym)	XX
not include	synonym of Lycium depressum Stocks (1852)	Lycium edgeworthii Dunal(1852)	Lycium edgeworthii Dunal	Flora of Iran, eFlora of India	Accept(law of priority)	Lycium edgeworthii Dunal	Asia-S. Iran to NW. India	ASIA-MW	Prodr. (DC.) 13(1): 525 (1852)			Lycium_depressum_KEW_K000759452	Lycium_edgeworthii_CJBG_G00200703
Lycium edgeworthii Miers (1854)	not include	not include	not include	Flora of Parkistan_tropics	Remove(synonym)	xx	Iran, Parkistan, India	ASIA-M	Ann. Mag. Nat. Hist., ser. 2 14: 183 (1854).
Lycium eenii S. Moore	Lycium eenii S.Moore	Lycium eenii S. Moore	Lycium eenii S.Moore			Lycium eenii S.Moore	AF-S-Namibia	AF-S
synonym of Lycium acutifolium E. Mey. ex Dunal (1852)	synonym of Lycium acutifolium Dunal	Lycium elliotii Dammer (1912)	synonym	Tropics_Madagasga	Remove(synonym)	xx			Zwei Pflanzengeogr. Docum. (Drège) (1842)	Prodr. (DC.) 13(1): 518 (1852)	Bot. Jahrb. Syst. 48: 229-230 (1913)	Lycium elliotii-MNHN-P-P00352090
Lycium elongatum Miers	Lycium elongatum Miers	Lycium elongatum Miers	synonym of Lycium confertum Miers (1854)	Flora of Agentina		Lycium elongatum Miers	SAM-NW. Argentina	SAM	Ann. Mag. Nat. Hist., ser. 2 14: 136 (1854).	Ann. Mag. Nat. Hist., ser. 2 14: 137-138 (1854).		Lycium_elongatum-BM000992175	Lycium confertum-BM000992174
Lycium europaeum L.	Lycium europaeum L.	Lycium europaeum L.	Lycium europaeum L.			Lycium europaeum L.	Medit	Medit
Lycium exsertum A. Gray	Lycium exsertum A.Gray	Lycium exsertum A. Gray	Lycium exsertum A. Gray			Lycium exsertum A. Gray	NAM-NW. Mexico	NAM
Lycium ferocissimum Miers	Lycium ferocissimum Miers	Lycium ferocissimum Miers	Lycium ferocissimum Miers			Lycium ferocissimum Miers	AF-S	AF-S
unresolved	synonym	Lycium flexicaule Pojark.	Lycium flexicaule Pojark.		Remove(synonym)	xx	Central Asia	Asia-M				Lycium_flexicaule_CVH_SD00017018
Lycium fremontii A. Gray	Lycium fremontii A.Gray	Lycium fremontii A. Gray	Lycium fremontii A.Gray			Lycium fremontii A.Gray	NAM	NAM
Lycium fuscum Miers	Lycium fuscum Miers	Lycium fuscum Miers	Lycium fuscum Miers			Lycium fuscum Miers	SAM-NW. Argentina	SAM
unresolved	Lycium gariepense A.M.Venter	Lycium gariepense A. M. Venter(2003)	Lycium gariepense A.M.Venter			Lycium gariepense A.M.Venter	AF-S-Namibia to Northern Cape Prov	AF-S
synonym of Grabowskia geniculata (Fernald) C.L.Hitchc	synonym	Lycium geniculatum Fernald(1900)	Lycium geniculatum Fernald			Lycium geniculatum Fernald	NAM-Mexico	NAM	1900-geniculatum_Proceedings of the American Academy of Arts and Sciences. - Page 566			Lycium geniculatum-GH-00077174
Lycium gilliesianum Miers	Lycium gilliesianum Miers	Lycium gilliesianum Miers	Lycium gilliesianum Miers			Lycium gilliesianum Miers	SAM-Argentina	SAM
Lycium glomeratum Sendtn.	Lycium glomeratum Sendtn.	Lycium glomeratum Sendtn.	Lycium glomeratum Sendtn.			Lycium glomeratum Sendtn.	SAM-Bolivia to Brazil and N. Argentina	SAM
unresolved	Lycium grandicalyx Joubert & Venter	Lycium grandicalyx Joubert & Venter	Lycium grandicalyx Joubert & Venter	AFPD, PSAF		Lycium grandicalyx Joubert & Venter	AF-S-Namibia to NW. Cape Prov	AF-S
unresolved	Lycium hantamense A.M.Venter	Lycium hantamense A. M. Venter	Lycium hantamense A.M.Venter	AFPD		Lycium hantamense A.M.Venter	AF-S-Northern Cape Prov	AF-S
Lycium hassei Greene	heterotypic synonym of Lycium brevipes Benth.(1844)	Lycium hassei Greene(1888)	synonym of Lycium brevipes var. hassei (Greene) C.L.Hitchc.	FONAM, ITIS	Remove(synonym)	xx	NAM	NAM				Lycium hassei-GH-00138738	Lycium brevipes var. hassei-GH-00077150	Lycium brevipes-GH-98001
Lycium hirsutum Dunal	Lycium hirsutum Dunal	Lycium hirsutum Dunal	Lycium hirsutum Dunal			Lycium hirsutum Dunal	AF-S	AF-S
Lycium horridum Thunb.	Lycium horridum Thunb.	Lycium horridum Thunb.	Lycium horridum Thunb.			Lycium horridum Thunb.	AF-S	AF-S
Lycium humile Phil.	Lycium humile Phil.	Lycium humile Phil.	Lycium humile Phil.			Lycium humile Phil.	SAM-N. Chile to NW. Argentina	SAM
Lycium infaustum Miers	Lycium infaustum Miers	Lycium infaustum Miers	Lycium infaustum Miers			Lycium infaustum Miers	SAM-N. Argentina	SAM
Lycium intricatum Boiss. (1838)	synonym of Lycium shawii Roem. & Schult.(1819)	synonym of Lycium schweinfurthii Dammer(1913)	Lycium intricatum Boiss.	EUMP, AFPD; GBIF		Lycium intricatum Boiss.	AF-N-Macaronesia, W. Medit. to Mauritania	AF-N	Elench. Pl. Nov.: 66 (1838).	Syst. Veg., ed. 15 : 693 (1819)	Xie, D.-M., Zhang, X.-B., Qian, D., Zha, X., Huang, L.-Q., 2016. Lycium amarumsp. nov. (Solanaceae) from Xizang, supported from morphological characters and phylogenetic analysis. Nordic Journal of Botany 34(5), 538-544.	Lycium_intricatum-G00343183	Lycium_shawii_MNHN-P-P00058757	intricatum->叶肉质；sch..叶稍薄？
Lycium isthmense F. Chiang	Lycium isthmense F.Chiang	synonym of Lycium nodosum var. isthmense (F. Chiang) F. Chiang (1983)	Lycium isthmense F.Chiang (1975)		Remove(variety)	xx	NAM-Mexico	NAM	Bol. Soc. Bot. México 35: 3 (-4), fig (1975).			Lycium isthmense_NMNH00027261	Lycium nodosum-K000586030
unresolved	synonym	Lycium kopetdaghi Pojark.	Lycium kopetdaghi Pojark.	Flora of Iran	Remove(synonym)	XX	Asia-NE. Iran to S. Turkmenistan and NW. Afghanistan	ASIA-M				Lycium kopetdaghi-NMNH02821605		? Derpessum
unresolved	Lycium leiospermum I.M.Johnst.	Lycium leiospermum I. M. Johnst.	Lycium leiospermum I.M.Johnst.			Lycium leiospermum I.M.Johnst.	NAM-NE. Mexico	NAM
Lycium leiostemum Wedd.	Lycium leiostemum Wedd.	Lycium leiostemum Wedd.	Lycium leiostemum Wedd.			Lycium leiostemum Wedd.	SAM-Peru to N. Chile	SAM
Lycium macrodon A. Gray	Lycium macrodon A.Gray	Lycium macrodon A. Gray	Lycium macrodon A.Gray			Lycium macrodon A.Gray	NAM-California to Mexico (Sonora)	NAM
Lycium makranicum Schonebeck-Temesy	synonym	Lycium makranicum Schönb.-Tem.	Lycium makranicum Schönb.-Tem.	Flora of Iran, Flora of Parkistan	Remove(synonym)	xx	Asia-SW. Pakistan	AISA-M				Lycium makranicum-G00343124
Lycium martii Sendtn.	Lycium martii Sendtn.	Lycium martii Sendtn.	Lycium martii Sendtn.			Lycium martii Sendtn.	SAM-Brazil Northeast and Cuba	SAM
Lycium mascarenense A.M. Venter & A.J. Scott	Lycium mascarenense A.M.Venter & A.J.Scott	synonym of Lycium elliotii Dammer	Lycium mascarenense A.M.Venter & A.J.Scott	AFPD, PSAF		Lycium mascarenense A.M.Venter & A.J.Scott	Mozambique to KwaZulu-Natal and W. Indian Ocean	AF-S				Lycium mascarenense-MNHN-P-P00352675	Lycium elliotii-MNHN-P-P00352090
Lycium megacarpum Wiggins	Lycium megacarpum Wiggins	Lycium megacarpum Wiggins	Lycium megacarpum Wiggins			Lycium megacarpum Wiggins	NAM-Mexico (Baja California)	NAM
Lycium minimum C.L. Hitchc.	Lycium minimum C.L.Hitchc.	Lycium minimum C. L. Hitchc.	Lycium minimum C.L.Hitchc.			Lycium minimum C.L.Hitchc.	Island-Galápagos	Percific Island
Lycium minutifolium Remy	Lycium minutifolium J.Remy	Lycium minutifolium J. Rémy	Lycium minutifolium Remy			Lycium minutifolium Remy	SAM-Chile	SAM
Lycium morongii Britton	Lycium morongii Britton	synonym of Lycium glomeratum Sendtn.	synonym of Lycium glomeratum Sendtn.	Flora of Agentina	Remove(synonym)	xx	SAM	SAM				Lycium morongii-GH-00077192	Lycium glomeratum-K000586009	DNA
not include	not include	Lycium ningxiaense R. J. Wang & Q. Liao	Lycium ningxiaense R.J.Wang & Q.Liao(2011)			Lycium ningxiaense R. J. Wang & Q. Liao	Asia-China	AISA-E	Liao, Q., Wang, R., 2014. Lycium ningxiaense, a replacement name for Lycium parvifolium TY Chen & Xu L. Jiang (Solanaceae). Phytotaxa 173(4), 299-300.
Lycium nodosum Miers	Lycium nodosum Miers	Lycium nodosum Miers	synonym of Lycium americanum Jacq.	Flora of Agentina		Lycium nodosum Miers	SAM	SAM				Lycium nodosum-K000586030	Lycium americanum-G00168095
Lycium oxycarpum Dunal	Lycium oxycarpum Dunal	Lycium oxycarpum Dunal	Lycium oxycarpum Dunal			Lycium oxycarpum Dunal	SW. Angola to Cape Prov.	AF-S
Lycium pallidum Miers	Lycium pallidum Miers	Lycium pallidum Miers	Lycium pallidum Miers			Lycium pallidum Miers	NAM	NAM
Lycium parishii A. Gray	Lycium parishii A.Gray	Lycium parishii A. Gray	Lycium parishii A.Gray			Lycium parishii A.Gray	California to N. Mexico	NAM
Lycium parishii var. modestum (I.M. Johnst.) F. Chiang					Remove(variety)	xx
unresolved	synonym	synonym of Lycium berlandieri Dunal	Lycium peninsulare Brandegee (1916)		Remove(synonym)	xx	NAM	NAM				Lycium peninsulare-01412044
unresolved	synonym	Lycium petraeum Feinbrun	Lycium petraeum Feinbrun	EUMP		Lycium petraeum Feinbrun	SW. Jordan	ASIA-W
Lycium pilifolium C.H. Wright	Lycium pilifolium C.H.Wright	Lycium pilifolium C. H. Wright	Lycium pilifolium C.H.Wright			Lycium pilifolium C.H.Wright	AF-S	AF-S
Lycium prunus-spinosa Dunal	synonym of Lycium cinereum Thunb.	synonym of Lycium cinereum Thunb.	not include		Remove(synonym)	xx	AF-S	AF-S				Lycium cinereum_G00015063.jpg	Lycium prunus-spinosa-G00200580	Lycium cinereum-MNHN-P-P00329564
Lycium puberulum A. Gray	Lycium puberulum A.Gray	Lycium puberulum A. Gray	Lycium puberulum A.Gray			Lycium puberulum A.Gray	NAM-NE. Mexico	NAM
unresolved	Synonym of Lycium minutifolium J.Remy	Lycium pubitubum C. L. Hitchc.	Lycium pubitubum C.L.Hitchc.	Flora of Agentina		Lycium pubitubum C.L.Hitchc.	SAM-Argentina	SAM				Lycium puberulum-Wright - 1609	Lycium minutifolium-K000586036
Lycium pumilum Dammer	Lycium pumilum Dammer	Lycium pumilum Dammer	Lycium pumilum Dammer			Lycium pumilum Dammer	Namibia to Cape Prov	AF-S
not include	not include	Lycium qingshuigeense Xu L. Jiang & J. N. Li	Lycium qingshuigeense Xu L.Jiang & J.N.Li (2011)		Remove(hybird)	XX	Asia-China	ASIA-E	Li, J., Jiang, X., Li, Z., Chen, T., Zhang, Z., 2011. Lycium qingshuiheense, a new species Solanaceae from Ningxia, China. Guihaia 31(4), 427-429.
Lycium rachidocladum Dunal	Lycium rachidocladum Dunal	Lycium rachidocladum Dunal	Lycium rachidocladum Dunal			Lycium rachidocladum Dunal	SAM-Chile	SAM
Lycium repens Speg.	Lycium repens Speg.	Lycium repens Speg.	Lycium repens Speg.			Lycium repens Speg.	SAM-Argentina	SAM
unresolved	synonym	synonym of Lycium exsertum A. Gray(1885)	Lycium retusum B.L.Rob. & Fernald(1895)		Remove(synonym)	xx	NAM	NAM				Lycium retusum-NMNH-00027274	Lycium exsertum-NY138751
Lycium richii A. Gray	Synonym of Lycium brevipes Benth.	Synonym of Lycium brevipes Benth.	Synonym of Lycium brevipes Benth.	ITIS-not accept	Remove(synonym)	XX	NAM	NAM				Lycium brevipes-K000063310	Lycium richii-NY138757
Lycium ruthenicum Murray	Lycium ruthenicum Murr.	Lycium ruthenicum Murray	Lycium ruthenicum Murray			Lycium ruthenicum Murray	ASIA-ME	ASIA-ME
Lycium sandwicense A. Gray	heterotypic synonym of Lycium carolinianum Walter	Lycium sandwicense A. Gray	Lycium sandwicense A.Gray	FONAM, ITIS		Lycium sandwicense A.Gray	Pacific Island	Pacific Island				Lycium sandwicense-GH00077199	Lycium carolinianum-NY1163939
unresolved	Lycium schaffneri A.Gray ex Hemsl.	Lycium schaffneri A. Gray ex Hemsl.	Lycium schaffneri A.Gray ex Hemsl.			Lycium schaffneri A. Gray ex Hemsl.	NAM	NAM
Lycium schizocalyx C.H. Wright	Lycium schizocalyx C.H.Wright	Lycium schizocalyx C. H. Wright	Lycium schizocalyx C.H.Wright			Lycium schizocalyx C.H.Wright	AF-S	AF-S
unresolved	Lycium schreiteri F.A.Barkley	Lycium schreiteri F. A. Barkley	Lycium schreiteri F.A.Barkley	Flora of Agentina		Lycium schreiteri F.A.Barkley	SAM	SAM
Lycium schweinfurthii Dammer	Lycium schweinfurthii Dammer	Lycium schweinfurthii Dammer	Lycium schweinfurthii Dammer			Lycium schweinfurthii Dammer	Medit-Sicilia to S. & E. Medit.	Medit		Xie, D.-M., Zhang, X.-B., Qian, D., Zha, X., Huang, L.-Q., 2016. Lycium amarumsp. nov. (Solanaceae) from Xizang, supported from morphological characters and phylogenetic analysis. Nordic Journal of Botany 34(5), 538-544.	Levin, R.A., Shak, J.R., Miller, J.S., Bernardello, G., Venter, A.M., 2007. Evolutionary Relationships in Tribe Lycieae (Solanaceae), Acta Horticulturae. pp. 225-239.
Lycium shawii Roem. & Schult.	Lycium shawii Roem. & Schult.	Lycium shawii Roem. & Schult.	Lycium shawii Roem. & Schult.			Lycium shawii Roem. & Schult.	AF-S, AF-N, Asia, Medit	AF-SN
Lycium shockleyi A. Gray	Lycium shockleyi A.Gray	Lycium shockleyi A. Gray	Lycium shockleyi A.Gray			Lycium shockleyi A.Gray	NAM	NAM
unresolved	synonym	Lycium sokotranum Wagner & Vierh.	Lycium sokotranum R.Wagner & Vierh.		Remove(synonym)	xx	Yemen	AF-N				Lycium sokotranum-MA-01-0091696
Lycium stenophyllum J. Rémy	Lycium stenophyllum J.Rémy	Lycium stenophyllum J. Rémy	Lycium stenophyllum Remy			Lycium stenophyllum Remy	SAM-Peru to N. & N. Central Chile	SAM
Lycium strandveldense A.M. Venter	Lycium strandveldense A.M.Venter	Lycium strandveldense A. M. Venter	Lycium strandveldense A.M.Venter			Lycium strandveldense A.M.Venter	AF-S-Cape Prov	AF-S
synonym of Lycium acutifolium E. Mey. ex Dunal	Lycium tenue Willd.	synonym of Lycium horridum Thunb.	Lycium tenue Willd.	PSAF		Lycium tenue Willd.	AF-S-SW. & S. Cape Prov	AF-S				Lycium acutifolium_G00015065	Lycium tenue_K000405931	Lycium horridum_LINN 259.9
Lycium tenuispinosum S.B. Jones & W.Z. Faust	Lycium tenuispinosum S.B. Jones & W.Z. Faust	Lycium tenuispinosum S.B. Jones & W.Z. Faust	Lycium tenuispinosum S.B. Jones & W.Z. Faust			Lycium tenuispinosum S.B. Jones & W.Z. Faust	SAM-Paraguay to Argentina	SAM
Lycium tenuispinosum var. friesii (Dammer) C.H. Hitchc.					Remove(variety)	xx
Lycium tetrandrum Thunb.	Lycium tetrandrum Thunb.	Lycium tetrandrum Thunb.	Lycium tetrandrum Thunb.			Lycium tetrandrum Thunb.	AF-S-Angola to W. Cape Prov.	AF-S
Lycium texanum Correll	Lycium texanum Correll	Lycium texanum Correll	Lycium texanum Correll			Lycium texanum Correll	NAM	NAM
Lycium torreyi A. Gray	Lycium torreyi A.Gray	Lycium torreyi A. Gray	Lycium torreyi A.Gray			Lycium torreyi A.Gray	NAM-Mexico Northwest and New Mexico	NAM
Lycium truncatum Y.C. Wang	Lycium truncatum Y.C.Wang	Lycium truncatum Y. C. Wang	Lycium truncatum Y.C.Wang			Lycium truncatum Y.C.Wang	Asia-E-China	ASIA-E
Lycium tweedianum Griseb.	Synonym of Lycium infaustum Miers	not include	not include	FONAM, ITIS; Flora of Agentina	Remove(synonym)	XX	SAM	SAM
Lycium verrucosum Eastw.	Lycium verrucosum Eastw.	not include	not include	ITIS-not accept, GBIF->sysnonym	Remove(synonym)	xx
Lycium villosum Schinz	Lycium villosum Schinz	Lycium villosum Schinz	Lycium villosum Schinz			Lycium villosum Schinz	AF-S-Botswana to N. Cape Prov	AF-S
Lycium vimineum Miers	Lycium vimineum Miers	Lycium vimineum Miers	Lycium vimineum Miers			Lycium vimineum Miers	SAM-NE. Argentina to Uruguay	SAM
Lycium woodii Dammer(1912)	Synonym of Lycium cinereum Thunb.(1794)	Synonym of Lycium cinereum Thunb.	Synonym of Lycium cinereum Thunb.	GBIF->synonym	Remove(synonym)	XX	AF-S	AF-S	Bot. Jahrb. Syst. 48: 229 (1913)				Lycium cinereum_G00015063.jpg
Lycium yunnanense Kuang & A.M. Lu	Lycium yunnanense K.Z.Kuang & A.M.Lu	Lycium yunnanense Kuang & A. M. Lu	Lycium yunnanense Kuang & A.M.Lu			Lycium yunnanense Kuang & A.M.Lu	Asia-E-China	ASIA-E
	Lycium x argentino-cestroides Hieron.	Lycium × argentino-cestroides Hieron. ex Seckt	Lycium × argentinocestroides Hieron. ex Seckt	WFO, POWO	Remove(hybird)	xx	SAM-Argentina	SAM
	Lycium × ciliato-elongatum Bernardello	Lycium × ciliato-elongatum Bernardello	Lycium × ciliatoelongatum Bernardello	WFO, POWO	Remove(hybird)	xx	SAM-Argentina	SAM
	Lycium x elongato-cestroides Hieron.				Remove(hybird)	xx

## Sheet: language_family
culture-lingustic	Family-abbr
Afro-Asiatic	afa
SAM-Agentine	Agt
Austro-Asiatic	AuA
Aboriginal	Aus
Uto-Aztecan	azc
SAM-Chile	Chl
Guaicuruan	Gua
Hokan-Seri	hok
Indo-European	ine
Japanese	jpn
Khoisan	khi
Korean	kor
Keresan-Acoma	Krs
Kiowa-Tanoan	Kwt
Austronesian-Malagasy	map
Matacoan-Chorote	Mat
Niger-Congo	nic
Navajo	nxd
Papuan	paa
Sino-Tibetan	sit
Nilo-Saharan	ssa
Altic-Turkish	tut
Navajo	xnd
Zuni	zun
Muskogean	Mus
Reference 1	Dryer, Matthew S. & Haspelmath, Martin (eds.) 2013.The World Atlas of Language Structures Online.Leipzig: Max Planck Institute for Evolutionary Anthropology.(Available online at http://wals.info, Accessed on 2021-03-30.)
Reference 2	ISO 639-2: Language Code List - Codes for the representation of names of languages
Reference 3	ISO 639-5: Identifier _ Codes for the representation of names of languages

## Sheet: sequence ID
Species for phylogenetic analysis	Accession
Lycium acutifolium	EF137753
Lycium afrum	EF137754
Lycium amarum	KU745288
Lycium ameghinoi	DQ124501
Lycium americanum	DQ124502
Lycium amoenum	EF137755
Lycium andersonii	DQ124503
Lycium arenicolum	DQ124504
Lycium athium	EF137756
Lycium australe	EF137757
Lycium barbarum	HQ615065
Lycium berlandieri	DQ124506
Lycium boerhaviifolia	DQ124499
Lycium bosciifolium	DQ124507
Lycium brevipes	DQ124508
Lycium californicum	DQ124509
Lycium carolinianum	DQ124538
Lycium cestroides	DQ124513
Lycium chanar	EF137761
Lycium chilense	DQ124514
Lycium chinense	HM194911
Lycium ciliatum	EF137768
Lycium cinereum	DQ124517
Lycium cooperi	DQ124518
Lycium cuneatum	DQ124519
Lycium dasystemum	HM194913
Lycium decumbens	EF137770
Lycium depressum	EF137771
Lycium deserti	EU051859
Lycium eenii	EF137772
Lycium elongatum	DQ124520
Lycium europaeum	EF137773
Lycium exsertum	DQ124522
Lycium ferocissimum	DQ124523
Lycium fremontii	DQ124524
Lycium fuscum	EF137774
Lycium gariepense	EF137775
Lycium gilliesianum	DQ124526
Lycium grandicalyx	EF137776
Lycium hirsutum	DQ124527
Lycium horridum	DQ124528
Lycium infaustum	DQ124529
Lycium intricatum	EF137778
Lycium leiospermum	EF137779
Lycium macrodon	DQ124530
Lycium minimum	KM978537
Lycium minutifolium	EF137782
Lycium glomeratum	DQ124531
Lycium nodosum	DQ124532
Lycium oxycarpum	EF137784
Lycium pallidum	DQ124534
Lycium parishii	DQ124535
Lycium pilifolium	DQ124536
Lycium puberulum	JF284359
Lycium pumilum	EF137786
Lycium rachidocladum	EF137787
Lycium ruthenicum	HM194915
Lycium schizocalyx	DQ124539
Lycium schweinfurthii	EF137790
Lycium shawii	HM194917
Lycium shockleyi	DQ124540
Lycium stenophyllum	EF137792
Lycium strandveldense	EF137793
Lycium tenue	DQ124542
Lycium tenuispinosum	DQ124543
Lycium tetrandrum	DQ124544
Lycium texanum	DQ124545
Lycium torreyi	DQ124546
Lycium truncatum	HM194920
Lycium villosum	DQ124547
Lycium vimineum	DQ124549
Lycium yunnanense	HM194922
Nolana werdermannii	EF137799

## Sheet: use_references
References of the traditional uses of Lycium spp.
Aati, H., El-Gamal, A., Shaheen, H., Kayser, O., 2019. Traditional use of ethnomedicinal native plants in the Kingdom of Saudi Arabia. Journal of Ethnobiology and Ethnomedicine 15, 2.
Abdel-Sattar, E., Harraz, F.M., Al-Ansari, S.M., El-Mekkawy, S., Ichino, C., Kiyohara, H., Otoguro, K., Omura, S., Yamada, H., 2009. Antiplasmodial and antitrypanosomal activity of plants from the Kingdom of Saudi Arabia. Journal of natural medicines 63(2), 232-239.
Abdennacer, B., Karim, M., Yassine, M., Nesrine, R., Mouna, D., Mohamed, B., 2015. Determination of phytochemicals and antioxidant activity of methanol extracts obtained from the fruit and leaves of Tunisian Lycium intricatum Boiss. Food Chemistry 174, 577-584.
Abolhasanzadeh, Z., Ashrafi, H., Badr, P., Azadi, A., 2017. Traditional neurotherapeutics approach intended for direct nose to brain delivery. J Ethnopharmacol 209, 116-123.
Abou Auda, M., 2011. An ethnobotanical use of plants in the Middle Area, Gaza Strip, Palestine. Adv Environ Biol 5(11), 3681-3688.
Abou Zekry, S.S., Badawy, M.T., Ezzelarab, N.M., Abdellatif, A., 2021. Phytotherapy for diabetes mellitus; A review of Middle Eastern and North African folk medicinal plants. Journal of Herbmed Pharmacology 10(1), 1-13.
Abouri, M., El Mousadik, A., Msanda, F., Boubaker, H., Saadi, B., Cherifi, K., 2012. An ethnobotanical survey of medicinal plants used in the Tata Province, Morocco. Int J Med Plants Res 1(7), 99-123.
Abu-Darwish, M.S., Efferth, T., 2018. Medicinal plants from near east for cancer therapy. Frontiers in Pharmacology 9, 56.
Abu-Rabia, A., 2005. Indigenous practices among Palestinians for healing eye diseases and inflammations. Dynamis: Acta Hispanica ad Medicinae Scientiarumque. Historiam Illustrandam 25, 383-401.
Adams, J., Wong, M., Villasenor, E., Bracquemond, A., Navarrete, G., 2019. Chemistry of California Lycium cooperi and Lycium andersonii. European Journal of Medicinal Plants 29(3), 1-5.
Affes, M., Fakhfakh, J., Daoud, I., Brieudes, V., Halabalaki, M., El Feki, A., Allouche, N., 2017. UHPLC/HR-ESI-MS/MS Profiling of phenolics from Tunisian Lycium arabicum Boiss. antioxidant and anti-lipase activities' evaluation. Chem Biodivers 14(9), e1700095.
Ahmad, J., Malik, A.A., Shakya, L., 2013. Urban development: a threat to wild species of medicinal and aromatic plants. Middle-East J Sci Res 13, 947-951.
Ahmed, F.A., Abdallah, N.M., Ezz, M.K., El-Azab, M.M., 2017. Seasonal Variations and Identification of Biologically Active Constituents of Lycium shawii Plant Roem. & Shult. (Family Solanaceae). International Journal of Innovative Science, Engineering & Technology 4(11), 34-47.
Ahn, M., Park, J.S., Chae, S., Kim, S., Moon, C., Hyun, J.W., Shin, T., 2014. Hepatoprotective effects of Lycium chinense Miller fruit and its constituent betaine in CCl4-induced hepatic damage in rats. Acta Histochem 116(6), 1104-1112.
Aidi Wannes, W., Saidani Tounsi, M., 2020. Phytochemical composition and health properties of Lycium europaeum L.: A review. Acta Ecologica Sinica.
Al Nasr, I., Ahmed, F., Pullishery, F., El-Ashram, S., Ramaiah, V.V., 2016. Toxoplasmosis and anti-Toxoplasma effects of medicinal plant extracts-A mini-review. Asian Pac J Trop Med 9(8), 730-734.
Al-douri, N.A., 2000. A survey of medicinal plants and their traditional uses in Iraq. Pharm. Biol. 38(1), 74-79.
Aldoweriej, A.M., Alharbi, K.B., Saeed, E.M., El-Ashmawy, I.M., 2016. Antimicrobial activity of various extracts from some plants native to Alqassim Region, Saudi Arabia. Journal of Food, Agriculture & Environment 14(1), 14-19.
Al-Fatimi, M., 2019. Ethnobotanical survey of medicinal plants in central Abyan governorate, Yemen. Journal of Ethnopharmacology 241, 111973.
Al-Harbi, K.B., El-Tigani-Asil, E.A., Ahmed, A.F., El-Ashmawy, I.M., Al-Wabel, N.A., 2016. Wound healing potential of methanolic extracts of some plants native to Al-Qassim Region, Saudi Arabia. Journal of Food, Agriculture & Environment 14(3&4), 238-242.
Alharbi, N., 2017. Survey of plant species of medical importance to treat digestive tract diseases in Tabuk Region, Saudi Arabia. Journal of King Abdulaziz University-Science 29(1), 51-61.
Ali, S.S., El-Zawawy, N.A., Al-Tohamy, R., El-Sapagh, S., Mustafa, A.M., Sun, J., 2020. Lycium shawii Roem. & Schult.: A new bioactive antimicrobial and antioxidant agent to combat multi-drug/pan-drug resistant pathogens of wound burn infections. Journal of Traditional and Complementary Medicine 10(1), 13-25.
Allen, D.E., Hatfield, G., 2004. Medicinal plants in folk tradition: A ethnobotany of Britain and Ireland. Timber Press, Portland.
Al-Qura'n, S., 2008. Folk Medicinal Qualities of Aquatic Plants in Jordan. Journal of Herbs, Spices & Medicinal Plants 13(2), 95-106.
Al-Rawi, A., Chakravarty, H.L., 1964. Medicinal plants of Iraq. Minister of Agriculture, Government Press.
Al-Sodany, Y.M., Salih, A.B., Mosallam, H.A., 2013. Medicinal plants in Saudi Arabia: I. Sarrwat Mountains at Taif, KSA. Academic Journal of Plant Sciences 6(4), 134-145.
Ardakani, M.R.S., Farjadmand, F., Rahimi, R., 2018. Makhzan al Adviyeh and pointing to the scientific names of medicinal plants for the first time in a Persian book. Traditional and Integrative Medicine 3(4), 186-195.
Arenas, P., Scarpa, G.F., 2007. Edible wild plants of the chorote Indians, Gran Chaco, Argentina. Botanical Journal of the Linnean Society 153(1), 73-85.
Austin, D.F., 2004. Florida ethnobotany. CRC Press.
Azaizeh, H., Saad, B., Khalil, K., Said, O., 2006. The state of the art of traditional Arab herbal medicine in the Eastern region of the Mediterranean: a review. Evidence-Based Complementary and Alternative Medicine 3.
Bailey, C., Danin, A., 1981. Bedouin plant utilization in Sinai and the Negev. Economic Botany 35(2), 145-162.
Barboza, G.E., Cantero, J.J., Núñez, C., Pacciaroni, A.d.V., Ariza Espinar, L., 2009. Medicinal plants: A general review and a phytochemical and ethnopharmacological screening of the native Argentine Flora. Kurtziana 34(1-2), 7-365.
Barhoumi, T., Abderraba, M., 2019. Ethnobotanical study of medicinal plant in Djerba island, Tunisia. Arabian Journal of Medicinal and Aromatic Plants 5(2), 67-97.
Bellakhdar, J., Claisse, R., Fleurentin, J., Younos, C., 1991. Repertory of standard herbal drugs in the Moroccan pharmacopoea. Journal of Ethnopharmacology 35(2), 123-143.
Bendjedou, H., Barboni, L., Maggi, F., Bennaceur, M., Benamar, H., 2019. Alkaloids and sesquiterpenes from roots and leaves of Lycium europaeum L. (Solanaceae) with antioxidant and anti-acetylcholinesterase activities. Nat Prod Res, doi: 10.1080/14786419.14782019.11666386.
Bendjedou, H., Maggi, F., Bennaceur, M., Mancinelli, M., Benamar, H., Barboni, L., 2020. A new ionone derivative from Lycium intricatum Boiss. (Solanaceae). Nat. Prod. Res., 1-8.
Böck, B., 2018. The Lost Language of Ancient Babylonian Plants: From Myth to Medicine. Medicina nei Secoli 30(2), 505-530.
Borhani, M., Khoshzaban, Z., Jodeiri, B., Naseri, M., Kamlinejad, M., Faghihzade, S., 2014. Comparison between used herbs for treatment of gastroesophageal reflux disease [GERD] in Iranian Traditional of Medicine [ITM]. Advances in Environmental Biology, 773-781.
Bouaziz, M., Dhouib, A., Loukil, S., Boukhris, M., Sayadi, S., 2009. Polyphenols content, antioxidant and antimicrobial activities of extracts of some wild plants collected from the south of Tunisia. Afr. J. Biotechnol. 8(24), 7017-7027.
Boulila, A., Bejaoui, A., 2015. Lycium intricatum Boiss.: An unexploited and rich source of unsaturated fatty acids, 4-desmethylsterols and other valuable phytochemicals. Lipids Health Dis 14, 59.
Bye, R.A., 1985. Botanical perspectives of ethnobotany of the Greater Southwest. Economic Botany 39(4), 375-386.
Chaachouay, N., Benkhnigue, O., Zidane, L., 2020. Ethnobotanical study aimed at investigating the use of medicinal plants to treat nervous system diseases in the Rif of Morocco. J Chiropr Med 19(1), 70-81.
Cherouana, S., Touil, A., Rhouati, S., 2013. Two flavonoid glycosides from Lycium arabicum. Chemistry of Natural Compounds 49(5), 930-931.
Chiale, C.A., Cabrera, J., Juliani, H.R., 1990. Nα Cinnamoylhistamine derivates from Lycium cestroides. Phytochemistry 29(2), 688-689.
Christen, P., Kapetanidis, I., 1987. Flavonoids from Lycium halimifolium. Planta Med 53(06), 571-572.
Chung, J.W., Kongju National University, Yesan, Republic of Korea, 2009. Cultivar Discrimination of Korean and Chinese Boxthorn (Lycium chinense Mill. and Lycium barbarum L.) using SSR Markers. Korean Journal of Medicinal Crop Science 17(6), 445-451.
Clarke, P.A., 1985. Fruits and seeds as food for southern South Australian Aborigines. Journal of the Anthropological Society of South Australia 23(9), 9-22.
Commision of Chinese Pharmacopoeia, 1995. Drug Standard: Tibetan Medicine (Vol.1). Minister of Health, China.
Dafni, A., Yaniv, Z., 1994. Solanaceae as medicinal plants in Israel. Journal of Ethnopharmacology 44(1), 11-18.
Dahech, I., Farah, W., Trigui, M., Ben Hssouna, A., Belghith, H., Belghith, K.S., Ben Abdallah, F., 2013. Antioxidant and antimicrobial activities of Lycium shawii fruits extract. Int J Biol Macromol 60, 328-333.
Dehdari, S., Hajimehdipoor, H., Esmaeili, S., Choopani, R., Mortazavi, S.A., 2018. Traditional and modern aspects of hemorrhoid treatment in Iran: a review. Journal of Integrative Medicine 16(2), 90-98.
Delbanco, A.-S., Burgess, N.D., Cuni-Sanchez, A., 2017. Medicinal plant trade in Northern Kenya: economic importance, uses, and origin. Economic Botany 71(1), 13-31.
Divakar, M.C., Al-Siyabi, A., Varghese, S.S., Al- Rubaie, M., 2016. The Practice of Ethnomedicine in the Northern and Southern Provinces of Oman. Oman Medical Journal 31(4), 245-252.
Eissa, T.A., Palomino, O.M., Carretero, M.E., Gomez-Serranillos, M.P., 2014. Ethnopharmacological study of medicinal plants used in the treatment of CNS disorders in Sinai Peninsula, Egypt. J Ethnopharmacol 151(1), 317-332.
Elahi, A., Fereidooni, A., Shahabinezhad, F., Ajdari Tafti, M., Zarshenas, M.-M., 2016. An overview of amenorrhea and respective remedies in Traditional Persian Medicine. Trends in Pharmaceutical Sciences 2(1), 3-10.
El-Ghazali, G.E., Al-Khalifa, K.S., Saleem, G.A., Abdallah, E.M., 2010. Traditional medicinal plants indigenous to Al-Rass province, Saudi Arabia. Journal of Medicinal Plants Research 4(24), 2680-2683.
El-Mokasabi, F.M., Al-Sanousi, M. F., El-Mabrouk, R. M., 2018. Taxonomy and Ethnobotany of Medicinal Plants in Eastern Region of Libya. J. Environ. Sci. Toxicol. Food Technol. 12, 14-23.
El-Shabasy, A., 2016. Survey on medicinal plants in the flora of Jizan Region, Saudi Arabia. Int J Bot Stud 2(1), 38-59.
Erfanfar, F., Montaseri, H., Mohagheghzadeh, A., Hosseinkhani, A., 2015. Myrrh a traditional medicine or a multipurpose pharmaceutical excipient. Trends in Pharmaceutical Sciences 1(4), 207-212.
Esmaeili, S., Hamzeloo-Moghadam, M., Ghaffari, S., Mosaddegh, M., 2014. Cytotoxic activity screening of some medicinal plants from south of Iran. Research Journal of Pharmacognosy 1(4), 19-25.
Faidi, K., Baaka, N., Hammami, S., Mokni, R.E., Mighri, Z., Mhenni, M.F., 2016. Extraction of carotenoids from Lycium ferocissimum fruits for cotton dyeing: Optimization survey based on a central composite design method. Fibers and Polymers 17(1), 36-43.
Faridi, P., Moatamedi, M., Zarshenas, M.M., Abolhassanzadeh, Z., Mohagheghzadeh, A., 2015. Natural remedies in the Canon of Medicine for dentistry and oral biology. Trends in Pharmaceutical Sciences 1(1), 4-9.
Fatiha, B.A., Souad, S., Ouafae, B., Jamila, D., Allal, D., Lahcen, Z., 2019. Ethnobotanical study of medicinal plants used in the region of middle Oum Rbia (Morocco). Plant Archives 19(2), 2005-2017.
Felger, R.S., Moser, M.B., 1976. Seri Indian food plants: desert subsistence without agriculture. Ecology of Food and Nutrition 5(1), 13-27.
Feyera, T., Mekonnen, E., Wakayo, B.U., Assefa, S., 2017. Botanical ethnoveterinary therapies used by agro-pastoralists of Fafan zone, Eastern Ethiopia. BMC Veterinary Research 13, 232.
Franklin-McEvoy, J., Jolly, S., 2006. The nutritive value of rangelands plants of Southern and Western Australia.
Fratkin, E., 1996. Traditional medicine and concepts of healing among Samburu pastoralists of Kenya. Journal of Ethnobiology(16), 63-98.
Friedman, J., Yaniv, Z., Dafni, A., Palewitch, D., 1986. A preliminary classification of the healing potential of medicinal plants, based on a rational analysis of an ethnopharmacological field survey among Bedouins in the Negev Desert, Israel. Journal of ethnopharmacology 16(2-3), 275-287.
Gaweesh, A., Sengab, A.E.-N.B., El-Hefnawy, H.M., Osman, S.M., Abdou, A.M., 2015. Phytoconstituents, cytotoxic, antioxidant and hepatoprotective activitiesof the aerial parts of Lycium shawii R. growing in Egypt. Medicinal & Aromatic Plants 04(1), 1000180.
Geraci, A., Amato, F., Di Noto, G., Bazan, G., Schicchi, R., 2018. The wild taxa utilized as vegetables in Sicily (Italy): a traditional component of the Mediterranean diet. Journal of Ethnobiology and Ethnomedicine 14(1), 14.
Ghafari, S., Esmaeili, S., Naghibi, F., Mosaddegh, M., 2013. Plants used to treat “tabe rebá”(malaria like fever) in Iranian Traditional Medicine. International Journal of Traditional and Herbal Medicine 1(6), 168-176.
Ghafari, S., Fahimi, S., Sahranavard, S., 2017. Plants used to treat hyperpigmentation in Iranian traditional medicine: a review. Research Journal of Pharmacognosy 4(4), 71-85.
Ghali, W., Vaudry, D., Jouenne, T., Marzouki, M.N., 2015. Lycium europaeum fruit extract: antiproliferative activity on A549 human lung carcinoma cells and PC12 rat adrenal medulla cancer cells and assessment of its cytotoxicity on cerebellum granule cells. Nutr Cancer 67(4), 637-646.
Ghasemi Pirbalouti, A., Momeni, M., Bahmani, M., 2012. Ethnobotanical study of medicinal plants used by Kurd tribe in Dehloran and Abdanan Districts, Ilam Province, Iran. African journal of traditional, complementary, and alternative medicines : AJTCAM 10(2), 368-385.
Gormally, J., 2011. Plants Found Along the Effluent Dominated Stretch of the Middle Santa Cruz River. University of Arizona (Tucson, AZ).
Grobler, B.A., Botha, M.S., 2019. Biodiversity and ethnobotanical assessment of Erf 657, Still Bay, Hessequa Municipality.
Guarrera, P.M., Savo, V., 2016. Wild food plants used in traditional vegetable mixtures in Italy. J Ethnopharmacol 185, 202-234.
Halberstein, R.A., 2012. Botanical Medicines for Diuresis, Studies in Natural Products Chemistry Volume 37. pp. 1-41.
Handa, S.S., Rakesh, D.D., Vasisht, K., 2006. Compendium of medicinal and aromatic plants: Volume 2 Asia. ICS -NIDO.
Hassan, W.H.B., Abdalla, R.H., 2017. UPLC-PDA-ESI-MS/MS analysis, isolation of chemical constituents, cytotoxic, antioxidant, antiviral and antimicrobial activities of the aerial parts of Lycium shawii Roem. & Schult. European Journal of Pharmaceutical and Medical Research 4(9), 4.
Hassan-Abdallah, A., Merito, A., Hassan, S., Aboubaker, D., Djama, M., Asfaw, Z., Kelbessa, E., 2013. Medicinal plants and their uses by the people in the Region of Randa, Djibouti. Journal of Ethnopharmacology 148(2), 701-713.
Hatami, H., Hatam, M., Hatami., N., 2012. Health orientation, research centeredness and realism in Avicenna's canon of medicine. Iranian Red Crescent Medical Journal 14(6), 331.
Hayat, J., Mustapha, A., Abdelmajid, M., Mourad, B., Ali, S., Said, E., Saadia, B., 2020. Ethnobotanical survey of medicinal plants growing in the region of" Oulad Daoud Zkhanine"(Nador Province), in Northeastern Morocco. Ethnobotany Research and Applications 19(39), 1-12.
Heneidy, S.Z., Bidak, L.M., 2004. Potential uses of plant species of the coastal Mediterranean region, Egypt. Pakistan Journal of Biological Sciences 7(6), 1010-1023.
Heneidy, S.Z., Halmy, M.W.A., Bidak, L.M., 2017. The ethnobotanical importance and conservation value of native plants in eastern Arabian Peninsula. Feddes Repertorium 128(3-4), 105-128.
Hinai, A.A., Lupton, D.A., Al Issai, G., 2020. Indigenous knowledge and folk use of medicinal plants in the Eastern Hajar Mountains, Oman. Journal of Medicinal Plants and By-Products 8(4), 104-110.
Hosseinkhani, A., Falahatzadeh, M., Raoofi, E., Zarshenas, M.M., 2016. An evidence-based review on wound healing herbal remedies from reports of Traditional Persian Medicine. Journal of Evidence-Based Complementary & Alternative Medicine 22(2), 334-343.
http://www.floraofqatar.com/lycium_shawii.htm
https://www.ddcr.org/florafauna/
https://www.enature.qa/specie/desert-thorn/
Hulley, I.M., 2018. Medicinal ethnobotany of the Little Karoo, South Africa, Faculty of Science. University of Johannesburg.
Hutchings, A., van Staden, J., 1994. Plants used for stress-related ailments in traditional Zulu, Xhosa and Sotho medicine. Part 1: Plants used for headaches. Journal of Ethnopharmacology 43(2), 89-124.
Idm'hand, E., Msanda, F., Cherifi, K., 2020. Ethnobotanical study and biodiversity of medicinal plants used in the Tarfaya Province, Morocco. Acta Ecologica Sinica 40(2), 134-144.
Inui, A., 2016. Herbal medicines: New horizons. Humana Press, New York.
Iwu, M.M., 2014. Handbook of African medicinal plants (2nd edition). CRC Press.
Jamous, R.M., Zaitoun, S.Y.A., Husein, A.I., Qasem, I.B., Ali-Shtayeh, M.S., 2015. Screening for biological activities of medicinal plants used in traditional arabic palestinian herbal medicine. European Journal of Medicinal Plants, 1-13.
Jaradat, N.A., Al-Ramahi, R., Zaid, A.N., Ayesh, O.I., Eid, A.M., 2016. Ethnopharmacological survey of herbal remedies used for treatment of various types of cancer and their methods of preparations in the West Bank-Palestine. BMC Complementary and Alternative Medicine 16, 93.
Jia, M., Li, X., 2005. Essence of Chinese Ethnomedicines (中国民族药志要). Chinese Medical Sciences Press, Beijing.
Johnson, A., Johnson, S., 2006. Garden plants poisonous to people. NSW Department of Primary Industries.
Karasov, W.H., 1985. Nutrient constraints in the feeding ecology of an omnivore in a seasonal environment. Oecologia 66(2), 280-290.
Khare, C.P., 2007. India Medicinal Plants: An Illustrated Dictionary. Springer.
Khare, C.P., 2015. Ayurvedic pharmacopoeial plant drugs: expanded therapeutics. CRC Press.
Kheirollahi, A.R., Mahmoodnia, L., Khodadustan, E., Kazemeini, H., Hasanvand, A., Hatamikia, M., 2019. Medicinal plants for kidney pain: An ethnobotanical study on Shahrekord city, West of Iran. Plant Science Today 6(3), 328-332.
Kirk, D.R., 1975. Wild Edible Plants of Western United States. Naturegraph Publishers. pp: 238-240.
Kong, Y.C., Chen, D.S., 1996. Elucidation of Islamic drugs in Hui Hui Yao Fang: a linguistic and pharmaceutical approach. Journal of Ethnopharmacology 54(2), 85-102.
Kuhnlein, H., Calloway, D., 1977. Contemporary Hopi food intake patterns. Ecology of Food and Nutrition 6(3), 159-173.
Ladyman, J.A.R., 2004. Lycium pallidum Miers, in: Francis, J.K. (Ed.) Wildland shrubs of the United States and its territories: Thamnic descriptions, Volume 1. PR: US Department of Agriculture, Forest Service, International Institute of Tropical Forestry; Fort Collins, CO: US Department of Agriculture, Forest Service, Rocky Mountain Research Station, pp. 453-455.
Lee, L., Lombard, K., 2011. Evaluating an a-sexual wolfberry (Lycium Pallidum), 2011 Society for Advancement of Hispanics/Chicanos and Native Americans in Science National Conference.
Lentini, F., Venza, F., 2007. Wild food plants of popular use in Sicily. Journal of Ethnobiology and Ethnomedicine 3(1), 15.
Leporatti, M.L., Ghedira, K., 2009. Comparative analysis of medicinal plants used in traditional medicine in Italy and Tunisia. Journal of Ethnobiology and Ethnomedicine 5, 31.
Lev, E., 2007. Drugs held and sold by pharmacists of the Jewish community of medieval (11–14th centuries) Cairo according to lists of materia medica found at the Taylor–Schechter Genizah collection, Cambridge. Journal of Ethnopharmacology 110(2), 275-293.
Lev, E., 2015. Botanical view of the use of plants in medieval medicine in the Eastern Mediterranean according to the Cairo Genizah. Israel Journal of Plant Sciences 62(1-2), 122-140.
Lev, E., Amar, Z., 2008. "Fossils" of practical medical knowledge from medieval Cairo. J Ethnopharmacol 119(1), 24-40.
Lev, E., Amar, Z., 2008. Chapter Six. Materia Medica: Detailed Items, Practical Materia Medica of the Medieval Eastern Mediterranean According to the Cairo Genizah. Brill, pp. 87-324.
Licata, M., Tuttolomondo, T., Leto, C., Virga, G., Bonsangue, G., Cammalleri, I., Gennaro, M.C., La Bella, S., 2016. A survey of wild plant species for food use in Sicily (Italy) – results of a 3-year study in four Regional Parks. Journal of Ethnobiology and Ethnomedicine 12, 12.
Louhaichi, M., Salkini, A.K., Estita, H.E., Belkhir, S., 2011. Initial assessment of medicinal plants across the Libyan Mediterranean coast. Advances in Environmental Biology 5(2), 359-370.
Mahmoud, T., Gairola, S., 2013. Traditional knowledge and use of medicinal plants in the Eastern Desert of Egypt: a case study from Wadi El-Gemal National Park. Journal of Medicinal Plants and By-Products 1(6), 10-17.
McGregor, R.L., 1986. Flora of the great plains. University Press of Kansas.
Meragiaw, M., 2016. Wild useful plants with emphasis on traditional use of medicinal and edible plants by the people of Aba’ala, North-eastern Ethiopia. J Med Plant Herb Ther Res 4(1), 1-16.
Meragiaw, M., Asfaw, Z., 2014. Review of antimalarial, pesticidal and repellent plants in the Ethiopian traditional herbal medicine. Journal of Herbal Science 3(3), 21-45.
Middleditch, B.S., Amer, A.M., 1991. Lycium L., Kuwaiti plants: distribution, traditional medicine, phytochemistry, pharmacology, and economic value. Elsevier Science Publishers B.V., Amsterdam, pp. 49-50.
Minnis, P.E., 1991. Famine foods of the northern American desert borderlands in historical context. Journal of Ethnobiology 11(2), 231-257.
Mintsa Mi Nzue, A.P., 2009. Use and conservation status of medicinal plants in the Cape Peninsula, western Cape province of South Africa. University of Stellenbosch.
Moerman, D.E., 1998. Native american ethnobotany. Timber Press, Portpan, Oregon.
Moteetee, A., Moffett, R.O., Seleteng-Kose, L., 2019. A review of the ethnobotany of the Basotho of Lesotho and the Free State Province of South Africa (South Sotho). South African Journal of Botany 122, 21-56.
Mothana, R.A., Kriegisch, S., Harms, M., Wende, K., Lindequist, U., 2011. Assessment of selected Yemeni medicinal plants for their in vitro antimicrobial, anticancer, and antioxidant activities. Pharm Biol 49(2), 200-210.
Moustafa, A., Zaghloul, M., El-Wahab, A., Alsharkawy, D., Ismail, M., Salman, A., 2016. Ecological prominence of Juniperus phoenicea L. growing in Gebel Halal, North Sinai, Egypt. Catrina: The International Journal of Environmental Sciences 15(1), 11-23.
Muñoz, M., Barrera, E., Meza, I. (1980). El uso medicinal y alimenticio de plantas nativas y naturalizadas en Chile. Museo Nacional de Historia Natural, Santiago de Chile, Publicación Ocasional​ 33, 3-89, p. 68
Nabhan, G.P., Felger, R.S., 1985. Wild desert relatives of crops: their direct uses as food, Plants for Arid Lands. Springer, pp. 19-33.
Naghibi, F., Khalaj, A., Mosaddegh, M., Malekmohamadi, M., Hamzeloo-Moghadam, M., 2014. Cytotoxic activity evaluation of some medicinal plants, selected from Iranian traditional medicine Pharmacopoeia to treat cancer and related disorders. J Ethnopharmacol 155(1), 230-239.
Naghizadeh, A., Hamzeheian, D., Akbari, S., Mohammadi, F., Otoufat, T., Asgari, S., Zarei, A., Noroozi, S., Nasiri, N., Salamat, M., Karbalaei, R., Mirzaie, M., Rezaeizadeh, H., Karimi, M., Jafari, M., 2020. UNaProd: A Universal Natural Product Database for Materia Medica of Iranian Traditional Medicine. Evidence-Based Complementary and Alternative Medicine 2020, 1-14.
Naji, S., Zarei, L., Pourjabali, M., Mohammadi, R., 2017. The extract of Lycium depressum stocks enhances wound healing in streptozotocin-induced diabetic rats. The International Journal of Lower Extremity Wounds 16(2), 85-93.
Narchi, N.E., Marlett, C.M., Hernández-Santana, G., 2020. What happened to Seri Sweets? Dietary transition through culinary acculturation. Journal of Ethnobiology 40(3), 348-367.
Nassif, F., Tanji, A., 2013. Gathered food plants in Morocco the long-forgotten species in ethnobotanical research. Life Sciences Leaflets 37, 17-54.
Norton, J., Majid, S.A., Allan, D., Al Safran, M., Böer, B., Richer, R., 2009. An illustrated checklist of the flora of Qatar. Browndown Publications, Gosport.
Oran, S.A.S., 2015. Selected wild aromatic plants in Jordan. International Journal of Medicinal Plants. Photon(108), 686-699.
Ouhaddou, H., Boubaker, H., Msanda, F., El Mousadik, A., 2015. An ethnobotanical study of medicinal plants of the Agadir Ida Ou Tanane province (southwest Morocco). Journal of Applied Biosciences 84(1), 7707-7722.
Ozar, A., Rahimi, A., Chiyaneh, E. R., Rezaeieh, K. A. P., 2016. Medicinal plants of Sulduz Region, West Azerbaijan Province, Iran and their characteristics. Der Pharmacia Lettre 8(8), 36-44.
Petersen, L.M., Moll, E.J., Collins, R., Hockings, M.T., 2012. Development of a compendium of local, wild-harvested species used in the informal economy trade, Cape Town, South Africa. Ecology and Society 17(2), 26.
Phondani, P.C., Bhatt, A., Elsarrag, E., Horr, Y.A., 2016. Ethnobotanical magnitude towards sustainable utilization of wild foliage in Arabian Desert. Journal of Traditional and Complementary Medicine 6(3), 209-218.
Pieroni, A., Nebel, S., Quave, C., Münz, H., Heinrich, M., 2002. Ethnopharmacology of liakra: traditional weedy vegetables of the Arbëreshë of the Vulture area in southern Italy. Journal of Ethnopharmacology 81(2), 165-185.
Pour, M.G., Mirazi, N., Seif, A., 2019. Treatment of liver and spleen illnesses by herbs: Recommendations of Avicenna’s heritage" Canon of Medicine". Avicenna Journal of Phytomedicine 9(2), 101-116.
Pullaiah, T., Krishnamurthy, K.V., Bahadur, B., 2017. Ethnobotany of India (volume 4) western and central Himalayas. Apple Academic Press, Waretown, NJ.
Qin, X., Luo, J., Gao, Z., 2002. Yao Ethnic Medicines in China. Ethnic Publishing House, Beijing.
Quave, C.L., Pieroni, A., 2007. Traditional health care and food and medicinal plant use among historic Albanian migrants and Italians in Lucania, Southern Italy, Traveling Cultures and Plants-The Ethnobiology and Ethnopharmacy of Human Migrations. pp. 204-226.
Rahman, M.A., Mossa, J.S., Al-Said, M.S., Al-Yahya, M.A., 2004. Medicinal plant diversity in the flora of Saudi Arabia 1: a report on seven plant families. Fitoterapia 75(2), 149-161.
Raichelson, R.M., 1979. Part four: The use of plants containing coumarins among native Americans of the Southwest and their biomedical relationship to serum albumin polymorphisms. Medical Anthropology 3(4), 477-502.
Rehman, N.U., Alsabahi, J.N., Bakht, N., Khan, A., Al-Harrasi, A., 2020. Chemical constituents and biological activities of the oil from Lycium shawii stem. Chemistry of Natural Compounds 56(6), 1156-1158.
Rehman, N.U., Hussain, H., Al-Riyami, S.A., Csuk, R., Khiat, M., Abbas, G., Al-Rawahi, A., Green, I.R., Ahmed, I., Al-Harrasi, A., 2016. Lyciumaside and Lyciumate: A new diacylglycoside and sesquiterpene lactone from Lycium shawii. Helvetica Chimica Acta 99(8), 632-635.
Rehman, N.U., Hussain, H., Al-Riyami, S.A., Green, I.R., Al-Harrasi, A., 2018. Chemical constituents isolated from Lycium shawii and their chemotaxonomic significance. Records of Natural Products 12(4), 380-384.
Rjeibi, I., Feriani, A., Ben Saad, A., Ncib, S., Sdayria, J., Saidi, I., Souid, S., Hfaiedh, N., Allagui, M.S., 2017. Phytochemical characterization and bioactivity of Lycium europaeum: A focus on antioxidant, antinociceptive, hepatoprotective and nephroprotective effects. Biomedicine and Pharmacotherapy 95, 1441-1450.
Rjeibi, I., Feriani, A., Ben Saad, A., Sdayria, J., Saidi, I., Ncib, S., Souid, S., Allagui, M.S., Hfaiedh, N., 2018. Lycium europaeum Extract: A New Potential Antioxidant Source against Cisplatin-Induced Liver and Kidney Injuries in Mice. Oxidative Medicine and Cellular Longevity 2018, 1-9.
Rodriguez, S., Pertino, M.W., Arcos, C., Reichert, L., Echeverria, J., Simirgiotis, M., Borquez, J., Cornejo, A., Areche, C., Sepulveda, B., 2020. Isolation, gastroprotective effects and untargeted metabolomics analysis of Lycium minutifolium J. Remy (Solanaceae). Foods 9(5), 565.
Rosa, A., Maxia, A., Putzu, D., Atzeri, A., Era, B., Fais, A., Sanna, C., Piras, A., 2017. Chemical composition of Lycium europaeum fruit oil obtained by supercritical CO2 extraction and evaluation of its antioxidant activity, cytotoxicity and cell absorption. Food Chem 230, 82-90.
Roth, I., Lindorf, H., 2013. South American medicinal plants: botany, remedial properties and general use. Springer Science & Business Media.
Sabah, C., Rachid, G., 2015. Ethnobotanical study of medicinal flora in the North East of Algeria - An empirical knowledge in Djebel Zdimm (Setif). Journal of Materials Science and Engineering A 5(1-2), 50-59.
Sadat-Hosseini, M., Farajpour, M., Boroomand, N., Solaimani-Sardou, F., 2017. Ethnopharmacological studies of indigenous medicinal plants in the south of Kerman, Iran. Journal of Ethnopharmacology 199, 194-204.
Safa, O., Soltanipoor, M.A., Rastegar, S., Kazemi, M., Dehkordi, K.N., Ghannadi, A., 2013. An ethnobotanical survey on hormozgan province, Iran. Avicenna Journal of Phytomedicine 3(1), 64-81.
Said, H.M., 1984. Potential of herbal medicines in modern medical therapy. Ancient Science of Life 4(1), 36.
Said, O., Khalil, K., Fulder, S., Azaizeh, H., 2002. Ethnopharmacological survey of medicinal herbs in Israel, the Golan Heights and the West Bank region. Journal of Ethnopharmacology 83(3), 251-265.
Sakkir, S., Kabshawi, M., Mehairbi, M., 2012. Medicinal plants diversity and their conservation status in the United Arab Emirates (UAE). Journal of Medicinal Plants Research 6(7), 1304-1322.
Samuels, M.I., Swarts, M., Schroeder, A., Ntombela, K., Cupido, C., 2018. Through the lens of a herder: insights into landscape ethno-ecological knowledge on rangelands in Namaqualand. Anthropology Southern Africa 41(2), 136-152.
Sannai, A., Fujimori, T., KatO, K., 1983. Neutral Volatile Components of" Kukoshi"(Lycium chinense M.). Agricultural and biological chemistry 47(10), 2397-2399.
Saunders, C.F., 1920. Useful wild plants of the United States and Canada. RM McBride, New York.
Scarpa, G.F., 2009. Wild food plants used by the indigenous peoples of the South American Gran Chaco: A general synopsis and intercultural comparison. Journal of Applied Botany and Food Quality(83), 90-101.
Schmelzer, G., Gurib-Fakim, A., 2008. Plant resources of tropical Africa 11 (1): medicinal plants 1. PROTA Foundation, Wageningen.
Segura, S., Fresnedo, J., Mathuriau, C., López, J., Andrés, J., Muratalla, A., 2018. The edible fruit species in Mexico. Genetic Resources and Crop Evolution 65(6), 1767-1793.
Seifu, T., Asres, K., Gebre-Mariam, T., 2006. Ethnobotanical and ethnopharmaceutical studies on medicinal plants of Chifra district, Afar region, North Eastern Ethiopia. Ethiopian Pharmaceutical Journal 24(1), 41-58.
Sen, S., Chakraborty, R., 2020. Herbal Medicine in India: indigenous knowledge, practice, innovation and its value. Springer, Singapore.
Shah, S.A., Shah, N.A., Bahmani, M., Mozaffari Nejad, A., Rafieian-Kopaei, M., 2018. Beliefs of herbal therapies of the community of the Ilam city of Ilam province, Iran. Journal of Pharmacy & Pharmacognosy Research 6(4), 299-317.
Sharaf, A.E.-M.M., Sofy, M.R., Abdullah, A., 2016. The Influence of edaphic factors on the level of some physiological parameters for Lycium shawii in Taba Protected Area, Egypt. IOSR Journal of Environmental Science, Toxicology and Food Technology 10(09), 66-71.
Sharma, A., Flores-Vallejo, R.D.C., Cardoso-Taketa, A., Villarreal, M.L., 2017. Antibacterial activities of medicinal plants used in Mexican traditional medicine. J Ethnopharmacol 208, 264-329.
Shava, S.J., , :. 1999. The use of indigenous plants as food by a rural community in the Eastern Cape: Tuku'A'Village, Peddie. Southern African Journal of Environmental Education(19), 85-98.
Shawky, R.A., Alzamel, N.M., 2020. Survey on medicinal plants in the flora of Al Riyadh Region, Saudi Arabia. EurAsian Journal of BioSciences 14(2), 3795-3800.
Sher, H., Alyemeni, M.N., 2011. Evaluation of anti-diabetic activity and toxic potential of Lycium shawii in animal models. Journal of Medicinal Plants Research 5(15), 3387-3395.
Soltan, M.M., Zaki, A.K., 2009. Antiviral screening of forty-two Egyptian medicinal plants. J Ethnopharmacol 126(1), 102-107.
Song, W., Xu, Z., 2002. Folk medicine of She in Sanming. Xiamen University Press, Xiamen.
Stoffle, R.W., Evans, M., Halmo, D., 1989. Native American Plant Resources in the Yucca Mountain Area, Nevada. Science Applications International Corporation.
Stoffle, R.W., Evans, M., Zedeño, M.N., Stoffle, B.W., Kesel, C., 1994. American Indians and Fajada Butte: Ethnographic Overview and Assessment for Fajada Butte and Traditional (Ethnobotanical) Use Study for Chaco Culture National Historical Park, New Mexico. Bureau of Applied Research in Anthropology, University of Arizona.
Stoffle, R.W., Halmo, D.B., Evans, M., Olmsted, J.E., 1990. Calculating the cultural significance of American Indian plants: Paiute and Shoshone ethnobotany at Yucca Mountain, Nevada. American Anthropologist 92(2), 416-432.
Suárez, M.E., 2019. Medicines in the forest: Ethnobotany of wild medicinal plants in the pharmacopeia of the Wichí people of Salta province (Argentina). Journal of Ethnopharmacology 231, 525-544.
Sudhersan, C., AboEl-Nil, M., Hussain, J., 2003. Tissue culture technology for the conservation and propagation of certain native plants. Journal of Arid Environments 54(1), 133-147.
Suleman, S., Beyene Tufa, T., Kebebe, D., Belew, S., Mekonnen, Y., Gashe, F., Mussa, S., Wynendaele, E., Duchateau, L., De Spiegeleer, B., 2018. Treatment of malaria and related symptoms using traditional herbal medicine in Ethiopia. J Ethnopharmacol 213, 262-279.
Sullivan, S., 1998. People, plants and practice in drylands: socio-political and ecological dimensions of resource-use by Damara farmers in north-west Namibia. University of London.
Tbatou, M., Belahyan, A., Belahsen, R., 2016. Wild edible plants traditionally used in the countryside of el Jadida, coastal area in the center of Morocco. Life Sciences Leaflets(75), 28-48.
Tej, R., Hamdi, A., Serairi Beji, R., Aidi Wannes, W., Bettaieb Rebey, I., Oueslati, S., Karray Bouraoui, N., 2019. Does Lycium europaeum leaf have antihyperglycemic, antihyperlipidemic and antioxidant effects. Brazilian Journal of Pharmaceutical Sciences(55), e18064.
Tej, R., Rodríguez-Mallol, C., Rodríguez-Arcos, R., Karray-Bouraoui, N., Molinero-Ruiz, L., 2018. Inhibitory effect of Lycium europaeum extracts on phytopathogenic soil-borne fungi and the reduction of late wilt in maize. European Journal of Plant Pathology 152(1), 249-265.
Teklehaymanot, T., Giday, M., 2010. Ethnobotanical study of wild edible plants of Kara and Kwego semi-pastoralist people in Lower Omo River Valley, Debub Omo Zone, SNNPR, Ethiopia. Journal of Ethnobiology and Ethnomedicine 6(1), 23.
Tiaiba, A., Derbali, M., Bendahmane, B.S., 2018. In vitro effect of crude extracts from eight Algerian steppe plants on mycelial growth and sporulation of Ascochyta pisi Lib. Anales de Biología(40), 115-120.
Toderich, K., Tsukatani, T., 2005. Water/Pasture Assessment of Registan Desert (Kandahar and Helmand Provinces). KIER Discussion Paper 606.
Tull, D., 2013. Edible and Useful Plants of the Southwest: Texas, New Mexico, and Arizona. University of Texas Press.
Turker, G., 2012. Free radical scavenging activity and phenolic content of edible wild fruits from Kazdagi (Ida Mountains), Turkey. Journal of Medicinal Plants Research 6(36), 4989-4994.
Tuttolomondo, T., Licata, M., Leto, C., Savo, V., Bonsangue, G., Letizia Gargano, M., Venturella, G., La Bella, S., 2014. Ethnobotanical investigation on wild medicinal plants in the Monti Sicani Regional Park (Sicily, Italy). J Ethnopharmacol 153(3), 568-586.
Ur Rehman, N., Halim, S.A., Khan, M., Hussain, H., Yar Khan, H., Khan, A., Abbas, G., Rafiq, K., Al-Harrasi, A., 2020. Antiproliferative and carbonic anhydrase ii inhibitory potential of chemical constituents from Lycium shawii and Aloe vera: Evidence from in silico target fishing and in vitro testing. Pharmaceuticals (Basel) 13(5), 94.
Van Damme, P., Van Den Eynden, V., Vernemmen, P., 1992. Plant uses by the Topnaar of the Kuiseb valley Namib Desert. Afr Focus(8), 223-252.
Vikrant, A., Ranjeet Kaur, P., 2020. A Perspective on therapeutic potential of weeds. Journal of Plant Science and Phytopathology 4(2), 42-54.
Volpato, G., Emhamed, A.A., Saleh, S.M.L., Broglia, A., di Lello, S., 2007. Procurement of traditional remedies and transmission of medical knowledge among Sahrawi people displaced in southwestern Algerian refugee camps, Traveling Plants and Cultures: The Ethnobiology and Ethnopharmacy of Human Migrations pp. 245-269.
Volpato, G., Kourková, P., Zelený, V., 2012. Healing war wounds and perfuming exile: the use of vegetal, animal, and mineral products for perfumes, cosmetics, and skin healing among Sahrawi refugees of Western Sahara. Journal of Ethnobiology and Ethnomedicine 8(1), 49.
Volpato, G., Waldstein, A., 2014. Eghindi Among Sahrawi Refugees of Western Sahara. Medical Anthropology 33(2), 160-177.
Welcome, A.K., Van Wyk, B.E., 2019. An inventory and analysis of the food plants of southern Africa. South African Journal of Botany 122, 136-179.
Weretilnyk, E.A., Bednarek, S., McCue, K. F., Rhodes, D., Hanson, A. D., 1989. Comparative biochemical and immunological studies of the glycine betaine synthesis pathway in diverse families of dicotyledons. Planta 178(3), 342-352.
Westbrooke, M., 2012. The pastoral history, biological and cultural signiﬁcance of the Scotia Country, far Western New South Wales, Proceedings of the Linnean Society of New South Wales. pp. A55-A68.
Wheat, N.M., 2014. An ethnobotanical, phytochemical and metabolomics investigstion of plants from the Paulshoek Communal Area, Namaqualand. University of Cape Town.
Wigrup, I., 2006. The role of indigenous knowledge in forest management: A Case Study from Masol and Sook Division, West Pokot, Kenya, Department of Silviculture. Swedish University of Agricultural Sciences, Umeå.
Wolfe, W.S., Weber, C.W., Arviso, K.D., 1985. Use and nutrient composition of traditional Navajo foods. Ecology of Food and Nutrition 17(4), 323-344.
Woo, W.-S., Chi, H.-J., Jado, A., 1976. Phytochemical survey of Saudi Arabian plants. Korean Journal of Pharmacognosy 7(4), 247-250.
World Health Organization, 1989. Medicinal plants in Viet Nam. WHO Regional Office for the Western Pacific, Manila.
World Health Organization, 1998. Medicinal plants in the Republic of Korea: information on 150 commonly used medicinal plants. WHO Regional Office for the Western Pacific, Manila.
Yang, Y., 1991. Tibetan Medicine (藏药志). People's Press of Qinghai, Qinghai.
Yeşil, Y., İnal, İ., 2019. Traditional knowledge of wild edible plants in Hasankeyf (Batman Province, Turkey). Acta Societatis Botanicorum Poloniae 88(3), 3633.
Yetman, D., Van Devender, T.R., 2002. Mayo ethnobotany: land, history, and traditional knowledge in northwest Mexico. University of California Press, Berkeley and Los Angeles, California.
Zaid, H., Said, O., Hadieh, B., 2011. Diabetes prevention and treatment with Greco-Arab and Islamic-based natural products. Civilization(15), 19-38.
Zhang, Y., 1996. Tibetan Medicine of China (中国藏药). Shanghai Science and Technology Publishing House, Shanghai.
Zhu, G., Du, J., Zhang, J., 2006. Tujia's Medicine (土家族医药). Zhongyi Guji Chubanshe Press, Beijing.
